# Supplementary material for: Correlation of DEPDC5 rs1012068 and rs5998152 Polymorphisms with Risk of Hepatocellular Carcinoma: A Systematic Review and Meta-Analysis
Source: Hindawi journal article supplement (doi:10.1155/2023/5957481), 2023-01-24
Supplement: f1 [file 5957481.f1.zip]

**Table S1.** Search strategies for each database.

| Database       | Potential relevant records | Records after duplicates removed | Records after screening titles and abstracts | Records excluded with reasons | Records included in final meta-analysis |
|----------------|----------------------------|----------------------------------|----------------------------------------------|-------------------------------|-----------------------------------------|
| PubMed         | n = 9                      | n = 9                            | n = 9                                        | n = 2                         | n = 7                                   |
| Embase         | n = 19                     | n = 10                           | n = 0                                        | n = 0                         | n = 0                                   |
| Web of Science | n = 10                     | n = 0                            | n = 0                                        | n = 0                         | n = 0                                   |
| CNKI           | n = 6                      | n = 6                            | n = 5                                        | n = 1                         | n = 4                                   |
| Scopus         | n = 10                     | n = 1                            | n = 1                                        | n = 0                         | n=1                                     |

**Abbreviations:** CNKI, Chinese National Knowledge Infrastructure; HCV, hepatitis C virus; HBV, hepatitis B virus.
