# Supplementary material for: Correlation of DEPDC5 rs1012068 and rs5998152 Polymorphisms with Risk of Hepatocellular Carcinoma: A Systematic Review and Meta-Analysis
Source: Hindawi journal article supplement (doi:10.1155/2023/5957481), 2023-01-24

**Figure S3**

Forest plot showing the relationship between DEPDC5 rs1012068 polymorphism and HCC risk in sensitivity analysis: (A) allelic (C vs. T), (B) recessive (CC vs. TC + TT), (C) dominant (CC + TC vs. TT), (D) homozygous (CC vs. TT) and (E) heterozygous (TC vs. TT).

**Abbreviations:** DEPDC5, pleckstrin domain-containing protein 5; HCC, hepatocellular carcinoma; CI, confidence interval; df, degree of freedom; M-H, Mantel-Haenszel.

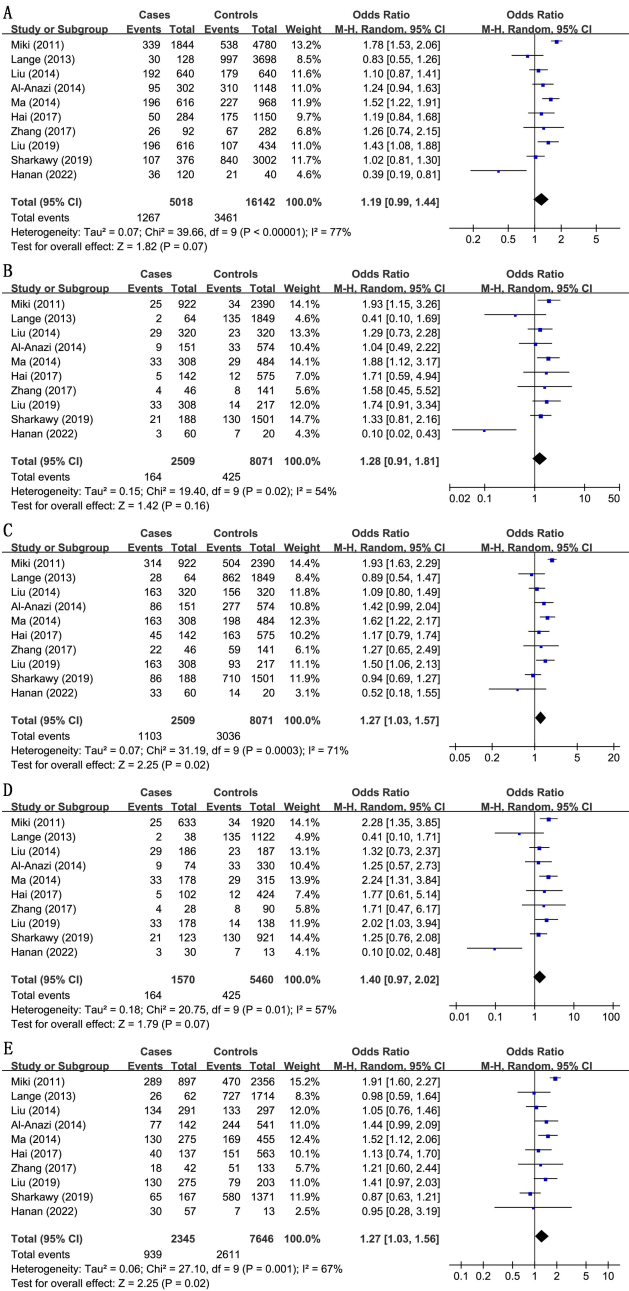

Supplement: f1 [file 5957481.f1.zip]
